# Supplementary material for: The blood DNA virome in 8,000 humans
Source: PubMed Central journal article supplement (PMC5378407; doi:10.1371/journal.ppat.1006292), 2017-03-22
Supplement: ppat.1006292.s008.pdf [file ppat.1006292.s008.pdf]

**Table S2.** Statistical significant differences for demographic characteristics and viral prevalence or viral load.

| Virus       | Sex       |            | Ancestry  |            | Age       |            |
|-------------|-----------|------------|-----------|------------|-----------|------------|
|             | Abundance | Prevalence | Abundance | Prevalence | Abundance | Prevalence |
| EBV         |           |            | 0.002     |            |           | 0.004      |
| CMV         |           |            |           |            |           |            |
| HHV6A       |           |            |           |            |           |            |
| HHV6B       | 0.016     |            | 0.005     | 0.006      |           | 0.004      |
| HHV7        |           |            | 1.04E-08  | 0.04       | 3.47E-12  | 0.004      |
| HTLV        |           |            |           | 0.004      |           |            |
| MCPyV       |           |            |           |            |           |            |
| Anellovirus |           | 0.004      |           | 0.004      |           | 0.004      |
